# Supplementary material
Source: PubMed Central journal article supplement (PMC8393295)
Supplement: sj-pdf-1-jcb-10.1177_0271678X211001216.pdf [file sj-pdf-1-jcb-10.1177_0271678X211001216.pdf]

SUPPLEMENTARY MATERIAL

|                                                 | <sup>18</sup> F-FDG to <sup>18</sup> F-FTP | <sup>18</sup> F-FDG to <sup>11</sup> C-PIB | <sup>18</sup> F-FTP to <sup>11</sup> C-PIB |
|-------------------------------------------------|--------------------------------------------|--------------------------------------------|--------------------------------------------|
| <b>Absolute interval in days</b>                | 36.6 (154.8)                               | 13.8 (30.9)                                | 22.8 (153.7)                               |
| <i>Mean (SD)</i>                                | [1-1622]                                   | [0-183]                                    | [0-1622]                                   |
| <i>[min-max]</i>                                |                                            |                                            |                                            |
| <b>Patients with both scans on the same day</b> | 0/117                                      | 25/117                                     | 92/117                                     |

Supplementary Table 1. Interval between <sup>18</sup>F-FDG, <sup>18</sup>F-Flortaucipir (FTP) and <sup>11</sup>C-PIB PET scans

**A.**

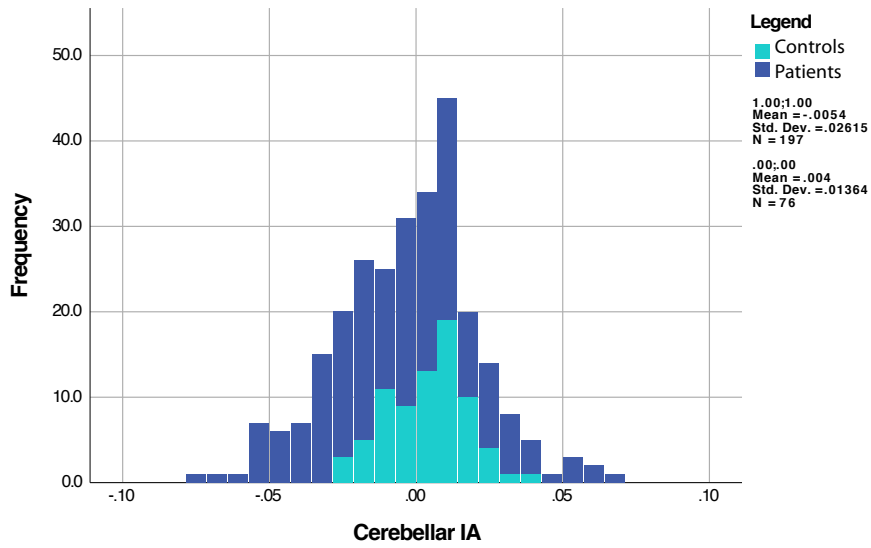

**B.**

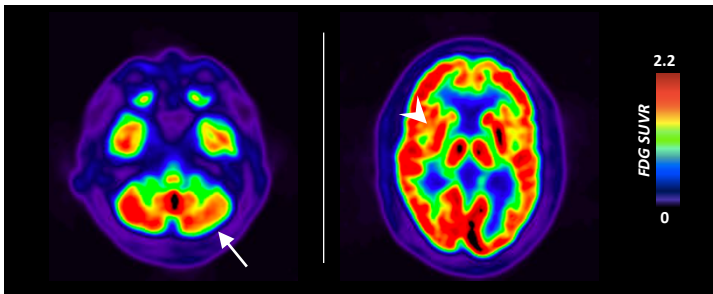

Supplementary Figure 1. (A) Distribution of  $^{18}\text{F}$ -FDG cerebellar IA in controls (n=76) and patients (n=197) (B) 2 controls that were excluded due to significant asymmetry in cerebellar metabolism (arrow) or basal ganglia (arrowhead), likely due to vascular disease.

| Absolute cortical IA | <b><sup>18</sup>F-FDG</b><br>(n=197) | <b><sup>11</sup>C-PIB</b><br>(n=117) | <b><sup>18</sup>F-FTP</b><br>(n=117) |
|----------------------|--------------------------------------|--------------------------------------|--------------------------------------|
| <b>Mean</b>          | 4.9 %                                | 3.1 %                                | 6.4 %                                |
| <b>SD</b>            | 4.0 %                                | 3.6 %                                | 6.7 %                                |
| <b>Min</b>           | 0.0 %                                | 0.0 %                                | 0.0 %                                |
| <b>Max</b>           | 18.0 %                               | 19.4 %                               | 38.6 %                               |

Supplementary Table 2. Distribution of absolute cortical index of asymmetry (IA) for each modality

| Patients (n=197) | Parietal | Frontal | Temporal | Occipital | Basal ganglia |
|------------------|----------|---------|----------|-----------|---------------|
| Cerebellar       | -.725*   | -.743*  | -.613*   | -.506*    | -.617*        |
| Parietal         |          | .827*   | .876*    | .788*     | .655*         |
| Frontal          |          |         | .780*    | .540*     | .729*         |
| Temporal         |          |         |          | .760*     | .648*         |
| Occipital        |          |         |          |           | .434*         |

| Controls (n=74) | Parietal | Frontal | Temporal | Occipital         | Basal ganglia     |
|-----------------|----------|---------|----------|-------------------|-------------------|
| Cerebellar      | -.161    | .066    | .146     | .001              | .005              |
| Parietal        |          | .691*   | .570*    | .488*             | .397 <sup>†</sup> |
| Frontal         |          |         | .650*    | .329 <sup>†</sup> | .349 <sup>†</sup> |
| Temporal        |          |         |          | .388 <sup>†</sup> | .508*             |
| Occipital       |          |         |          |                   | .289 <sup>†</sup> |

Supplementary Table 3. Relationship between regional <sup>18</sup>F-FDG IA and cerebellar <sup>18</sup>F-FDG IA in the whole patient cohort (top) and in controls (bottom)

*Pearson's correlation coefficients are shown;*

*\* p < .001*

*† p < .01*

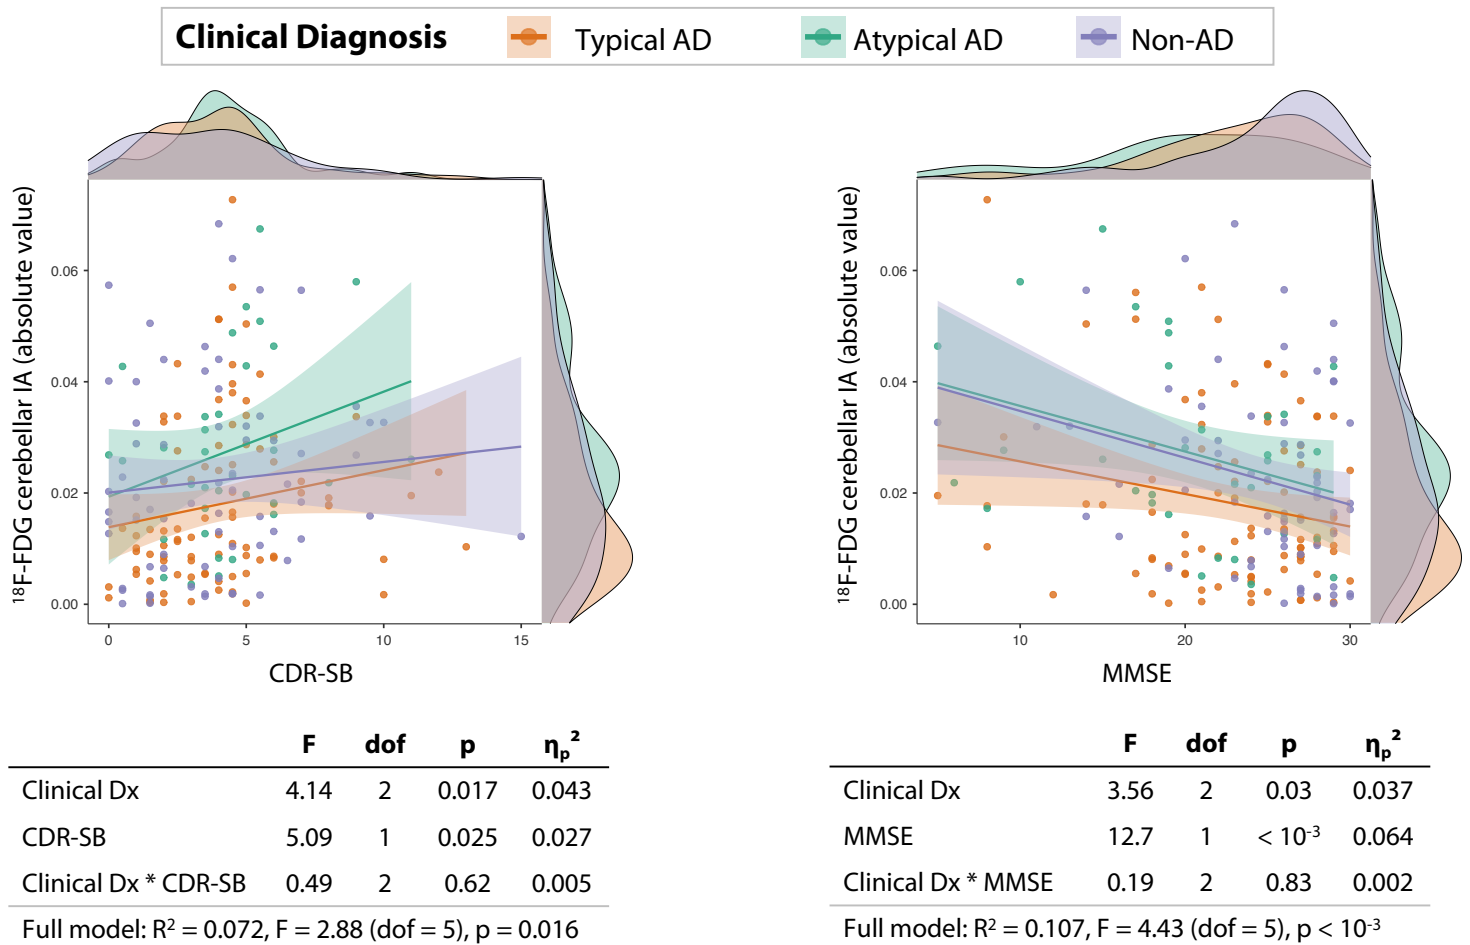

Supplementary Figure 2. Relationship between  $^{18}\text{F}$ -FDG cerebellar IA, CDR-SB (left) and MMSE (right) by clinical diagnosis. Relationship between disease severity (CDR-SB or MMSE) and cerebellar asymmetry on  $^{18}\text{F}$ -FDG was still significant when controlling for clinical diagnosis (coded as typical AD, atypical AD and non-AD). No interaction was seen between disease severity and clinical group.

**A.**

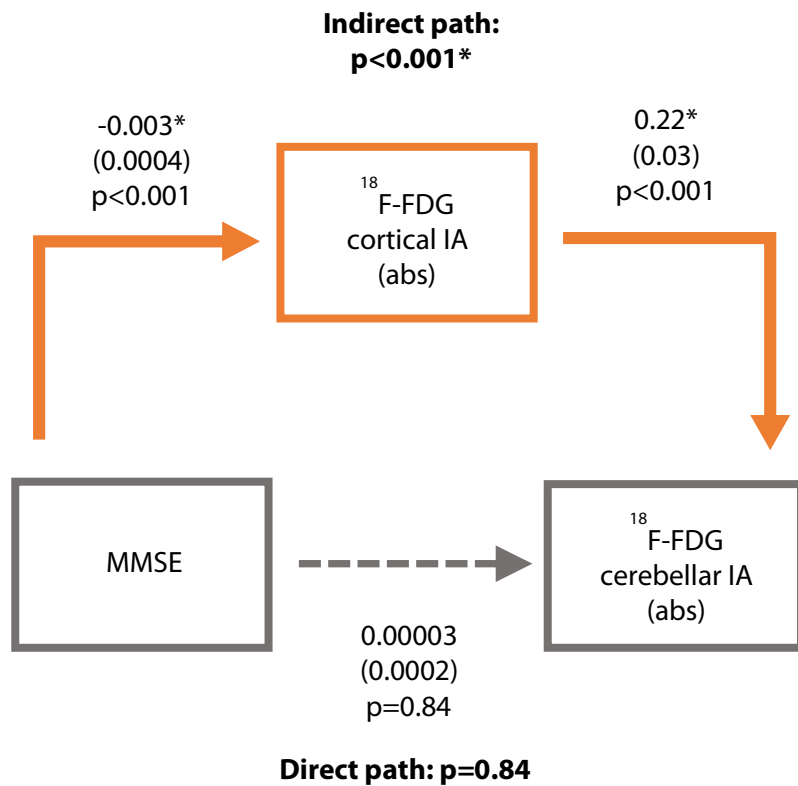

**B.**

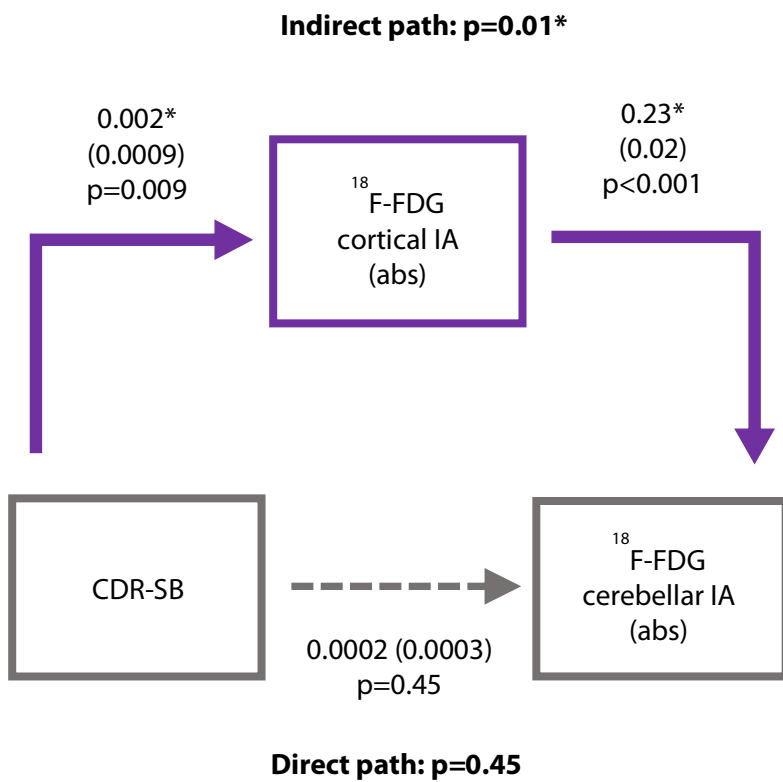

Supplementary Figure 3. Mediation analyses between  $^{18}\text{F-FDG}$  cerebellar IA, MMSE (A) and CDR-SB (B) ( $n = 197$ )

|                       | CCD (n=47)  | No CCD (n=146) | p value |
|-----------------------|-------------|----------------|---------|
| <b>Act. tremor UL</b> | 15/46 (33%) | 41/141 (29%)   | p= .65  |
| <b>Asymmetry</b>      | 5/46 (11%)  | 13/141 (9%)    | p= .74  |
| <b>Act. tremor LL</b> | 0/46 (0%)   | 0/141 (0%)     | p= 1.0  |
| <b>Asymmetry</b>      | 0/46 (0%)   | 0/141 (0%)     | p= 1.0  |
| <b>Pron. Sup.</b>     | 14/46 (30%) | 39/140 (28%)   | p= .74  |
| <b>Asymmetry</b>      | 7/46 (15%)  | 18/140 (13%)   | p= .69  |
| <b>Fing. Nose</b>     | 5/46 (11%)  | 11/141 (8%)    | p= .56  |
| <b>Asymmetry</b>      | 4/46 (9%)   | 6/141 (4%)     | p= .25  |
| <b>Heel to shin</b>   | 2/21 (10%)  | 0/38 (0%)      | p= .06  |
| <b>Asymmetry</b>      | 0/21 (0%)   | 0/38 (0%)      | p= 1.0  |
| <b>Tandem walk</b>    | 16/45 (36%) | 47/138 (34%)   | p= .86  |
| <b>Ataxic gait</b>    | 0/45 (0%)   | 0/141 (0%)     | p= 1.0  |

Supplementary Table 4. Tests of cerebellar function on neurological examination in patients

Number of subjects with abnormal test are indicated with percentage (%). For bilateral tests, number of subjects with asymmetric findings (L>R or R>L) are indicated with percentage (%).

*Act. Tremor*: action or postural tremor. UL: upper limbs, LL: lower limbs

*Pron. Sup.*: pronation/supination of hand

*Fing. Nose*: Finger to Nose

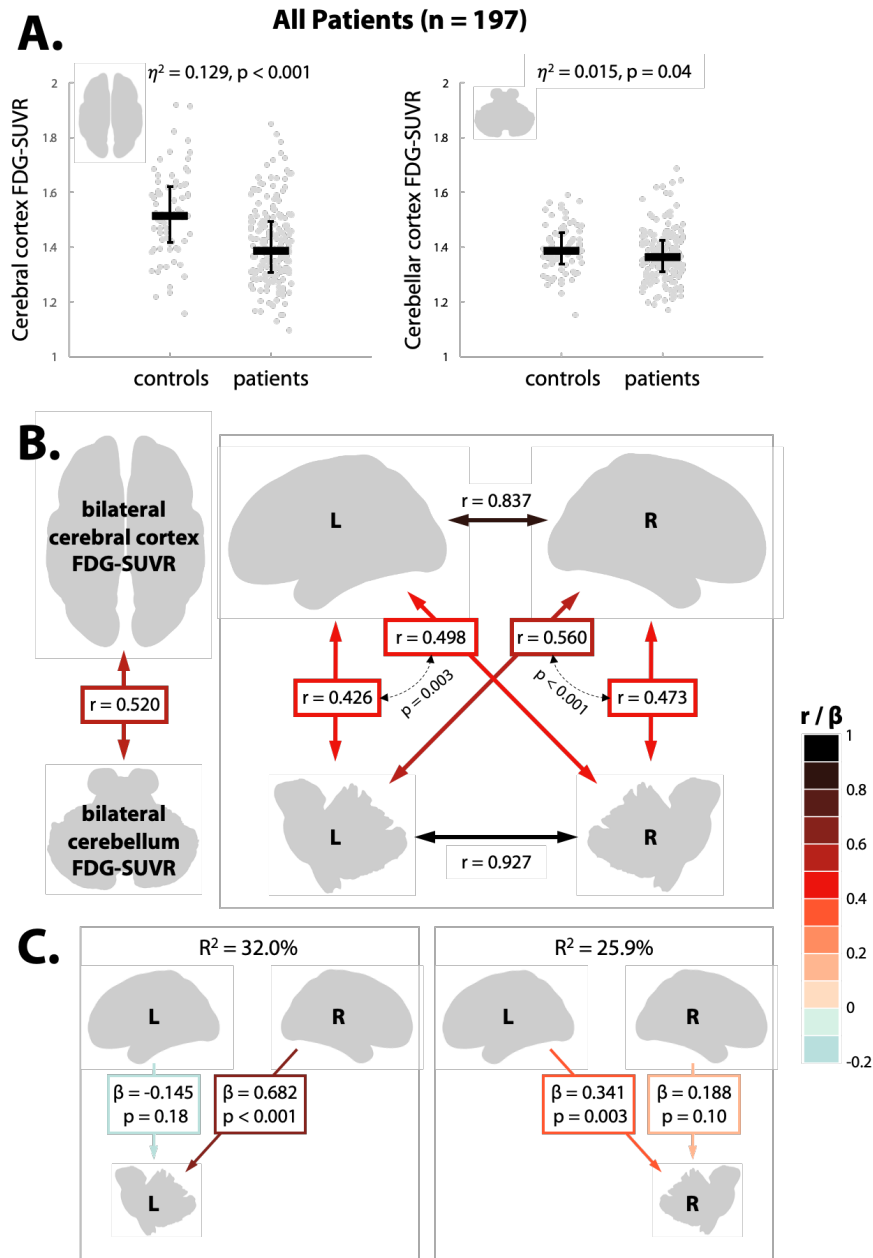

Supplementary Figure 4. Analyses similar to Figure 6 but additionally including the 51 patients with significant cerebellar  $^{18}\text{F}$ -FDG asymmetry.
